# Supplementary material
Source: publisher figshare collection journal article supplement (https://karger.figshare.com/ndownloader/files/8708671)
Supplement: Supplementary file 1 [file 8708671]

**Supplementary Table 1. Altered genes detected by array comparative genomic hybridization (CGH) and their copy number variation (CNV information)**

| CNV  | chr | Loci   | Gene     | Name                                                                                         | Information a/w disorder (NCBI)                                                                                                                                                | CNV database                    |
|------|-----|--------|----------|----------------------------------------------------------------------------------------------|--------------------------------------------------------------------------------------------------------------------------------------------------------------------------------|---------------------------------|
| Gain | 1   | p36.13 | CROCC    | ciliary rootlet coiled-coil, rootletin                                                       | ND                                                                                                                                                                             | 1 loss/30 control               |
| Gain | 1   | q21.3  | LCE3C    | late cornified envelope 3C                                                                   | Atopic dermatitis, RA, Psoriasis                                                                                                                                               | 1 control loss                  |
| Gain | 1   | q21.3  | LCE1E    | late cornified envelope 1E                                                                   | ND                                                                                                                                                                             | 1 control loss                  |
| Gain | 1   | q21.3  | LCE1D    | late cornified envelope 1D                                                                   | ND                                                                                                                                                                             | 1 control loss                  |
| Loss | 3   | q29    | MIR570   | microRNA 570                                                                                 | ND                                                                                                                                                                             | 1 control loss                  |
| Loss | 3   | q29    | MUC20    | mucin 20, cell surface associated                                                            | nephropathy                                                                                                                                                                    | 1 control gain                  |
| Loss | 4   | q13.2  | UGT2B17  | UDP glucuronosyltransferase 2 family, polypeptide B17                                        | osteoporosis, prostate cancer                                                                                                                                                  | 409 gain, 318 loss/1184 control |
| Loss | 4   | q13.2  | UGT2B15  | UDP glucuronosyltransferase 2 family, polypeptide B15                                        | prostate ccancer                                                                                                                                                               | 1 control loss                  |
| Gain | 5   | q35.3  | BTNL3    | butyrophilin-like 3                                                                          | ND                                                                                                                                                                             | 1 control loss                  |
| Loss | 6   | p21.32 | HLA-DRB5 | major histocompatibility complex, class II, DR beta 5                                        | multiple sclerosis                                                                                                                                                             | 317 gain,loss/1184 control      |
| Loss | 8   | p11.23 | FGFR1    | fibroblast growth factor receptor 1                                                          | squamous lung cancer, bladder cancer, MPN, leukemia/lymphoma, Pfeiffer syndrome, Jackson-Weiss syndrome, Antley-Bixler syndrome, osteoglophonic dysplasia, Kallmann syndrome 2 | 1 gain/776 control              |
| Loss | 8   | p11.23 | C8orf86  | .                                                                                            | ND.                                                                                                                                                                            | 1 control gain                  |
| Loss | 8   | p11.23 | RNF5P1   | ring finger protein 5 pseudogene 1                                                           | ND                                                                                                                                                                             | 35 gain,loss/270 control        |
| Loss | 8   | p11.23 | TACC1    | transforming, acidic coiled-coil containing protein 1                                        | breast cancer                                                                                                                                                                  | 2 loss/450 control              |
| Loss | 8   | p11.23 | PLEKHA2  | pleckstrin homology domain containing, family A (phosphoinositide binding specific) member 2 | leukemia                                                                                                                                                                       | 6 loss/2026 healthy control     |

|      |    |        |         |                                                            |                                                 |                                |
|------|----|--------|---------|------------------------------------------------------------|-------------------------------------------------|--------------------------------|
| Loss | 8  | p11.23 | HTRA4   | HtrA serine peptidase 4                                    | ND                                              | No CNV                         |
| Loss | 8  | p11.23 | TM2D2   | TM2 domain containing<br>2                                 | ND.                                             | 1 control loss                 |
| Loss | 8  | p11.23 | ADAM9   | ADAM metallopeptidase<br>domain 9                          | melanoma, breast cancer<br>prostate cancer, HCC | 1 control loss                 |
| Loss | 8  | p11.23 | ADAM32  | ADAM metallopeptidase<br>domain 32                         | ND                                              | 1 gain/30 control              |
| Loss | 8  | p11.22 | ADAM5P  | ADAM metallopeptidase<br>domain 5, pseudogene              | ND                                              | 480 loss/1184<br>control       |
| Loss | 8  | p11.22 | ADAM3A  | ADAM metallopeptidase<br>domain 3A                         | ND                                              | 480 loss/1184<br>control       |
| Loss | 11 | p15.4  | OR52N5  | olfactory receptor, family<br>52, subfamily N,<br>member 5 | ND                                              | 1 control loss                 |
| Loss | 11 | q11    | OR4C11  | olfactory receptor, family<br>4, subfamily C, member<br>11 | ND                                              | 1 control loss                 |
| Loss | 11 | q11    | OR4P4   | olfactory receptor, family<br>4, subfamily P, member<br>4  | ND                                              | 1 loss/20 control              |
| Loss | 11 | q11    | OR4S2   | olfactory receptor, family<br>4, subfamily S, member<br>2  | ND                                              | 1 control loss                 |
| Loss | 11 | q11    | OR4C6   | olfactory receptor, family<br>4, subfamily C, member<br>6  | ND                                              | 1 control loss                 |
| Gain | 12 | q24.31 | GPR109A | G protein-coupled<br>receptor 109A                         | ND                                              | 1 control loss                 |
| Gain | 12 | q24.31 | GPR109B | G protein-coupled<br>receptor 109B                         | schizophrenia                                   | 16 gain/450 control            |
| Loss | 13 | q12.11 | ZMYM2   | zinc finger, MYM-type 2                                    | MPN, T-cell lymphoma                            | 1 control loss                 |
| Loss | 13 | q12.11 | GJA3    | gap junction protein,<br>alpha 3, 46kDa                    | cataract                                        | 2 loss/2026 healthy<br>control |
| Loss | 13 | q12.11 | GJB2    | gap junction protein,<br>beta 2, 26kDa                     | hearing loss                                    | 2 gain/90 control              |
| Loss | 13 | q12.11 | GJB6    | gap junction protein,<br>beta 6, 30kDa                     | gastric cancer, epidermal tumor                 | 1 loss/776 control             |
| Loss | 13 | q12.11 | CRYL1   | crystallin, lambda 1                                       | ND                                              | 1 loss/112 control             |
| Loss | 13 | q12.11 | IFT88   | intraflagellar transport<br>88 homolog<br>(Chlamydomonas)  | HCC                                             | 1 gain/30 control              |
| Loss | 13 | q12.11 | IL17D   | interleukin 17D                                            | ND                                              | No CNV                         |

|      |    |        |           |                                                         |                                                              |                             |
|------|----|--------|-----------|---------------------------------------------------------|--------------------------------------------------------------|-----------------------------|
| Loss | 13 | q12.11 | N6AMT2    | N-6 adenine-specific DNA methyltransferase 2 (putative) | ND                                                           | No CNV                      |
| Loss | 13 | q12.11 | XPO4      | exportin 4                                              | ND                                                           | 2 gain/39 control           |
| Loss | 13 | q12.11 | LATS2     | LATS, large tumor suppressor, homolog 2 (Drosophila)    | nasopharyngeal cancer, breast cancer                         | 2 gain/30 control           |
| Gain | 14 | q11.2  | DAD1      | defender against cell death 1                           | thyroid cancer, esophageal adenocarcinoma                    | 1 gain/272 control          |
| Gain | 14 | q11.2  | ABHD4     | abhydrolase domain containing 4                         | ND                                                           | No CNV                      |
| Gain | 15 | q13.3  | FAM7A3    | family with sequence similarity 7, member A3            | ND                                                           | 1 gain/20 control           |
| Gain | 15 | q13.3  | FAM7A2    | family with sequence similarity 7, member A2            | ND                                                           | 1 gain/20 control           |
| Gain | 15 | q13.3  | FAM7A1    | family with sequence similarity 7, member A1            | ND                                                           | 1 gain/20 control           |
| Gain | 15 | q15.3  | CASC4     | cancer susceptibility candidate 4                       | soft tissue sarcoma                                          | no CNV                      |
| Loss | 16 | p13.11 | PDXDC1    | pyridoxal-dependent decarboxylase domain containing 1   | ND                                                           | 1 control gain              |
| Gain | 17 | q12    | CCL4      | chemokine (C-C motif) ligand 4                          | cystic fibrosis                                              | 1 control loss              |
| Loss | 22 | q11.23 | LOC391322 | .                                                       | ND                                                           | 630 gain, loss/1184 control |
| Loss | 22 | q11.23 | GSTT1     | glutathione S-transferase theta 1                       | Hirschsprung disease, head and neck cancer, Hodgkin lymphoma | 630 gain, loss/1184 control |
| Loss | 22 | q11.23 | GSTTP2    | glutathione S-transferase theta pseudogene 2            | ND                                                           | 630 gain, loss/1184 control |
| Gain | X  | q28    | OPN1MW    | opsin 1 (cone pigments), medium-wave-sensitive          | blindness                                                    | 1 loss control              |
| Gain | X  | q28    | OPN1MW2   | opsin 1 (cone pigments), medium-wave-sensitive 2        | ND                                                           | 1 loss control              |
| Gain | X  | q28    | TEX28     | testis expressed 28                                     | ND                                                           | 1 loss control              |

ND, not described
